# Supplementary material
Source: bioRxiv or medRxiv preprint supplement (https://www.biorxiv.org/highwire/filestream/73188/field_highwire_adjunct_files/9/091512-8.pdf)

**Figure S8A**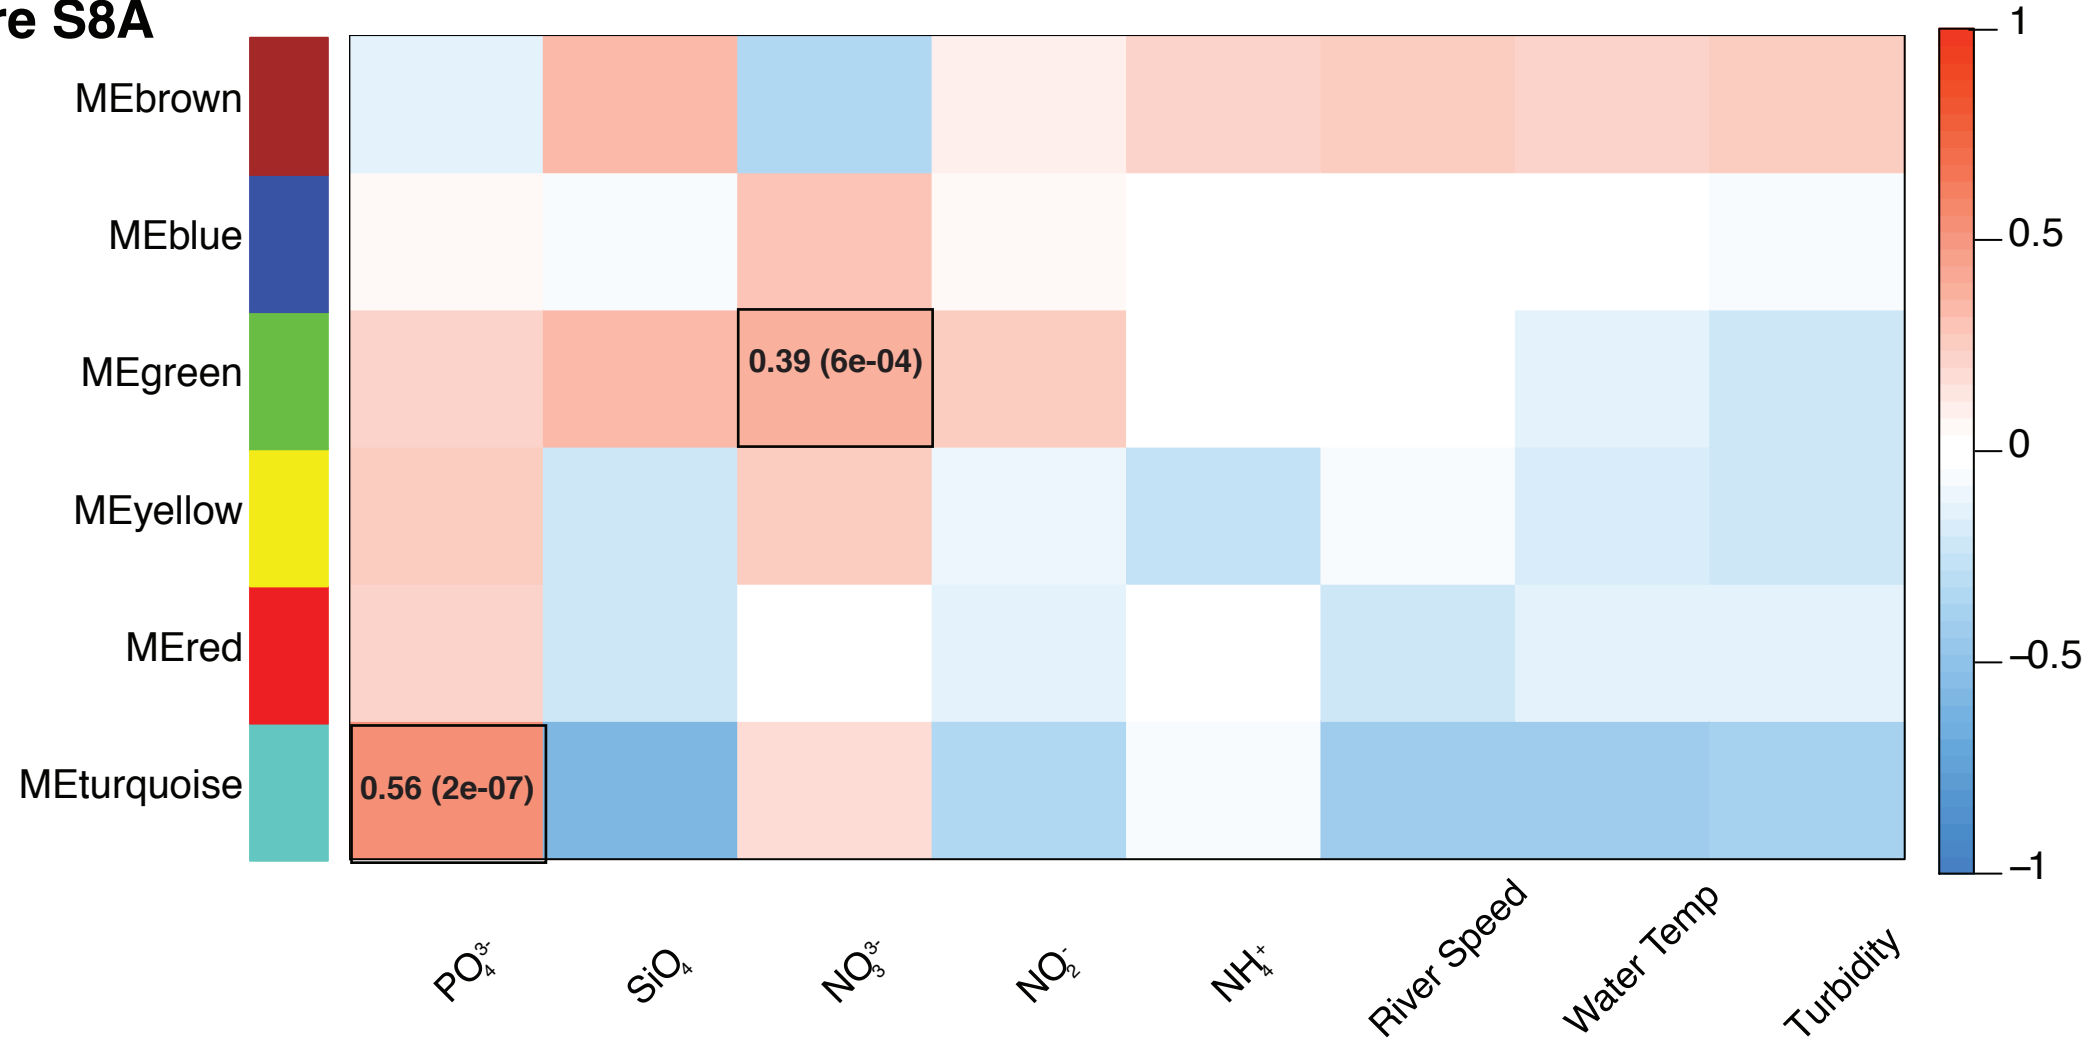**B****Module membership vs. population significance**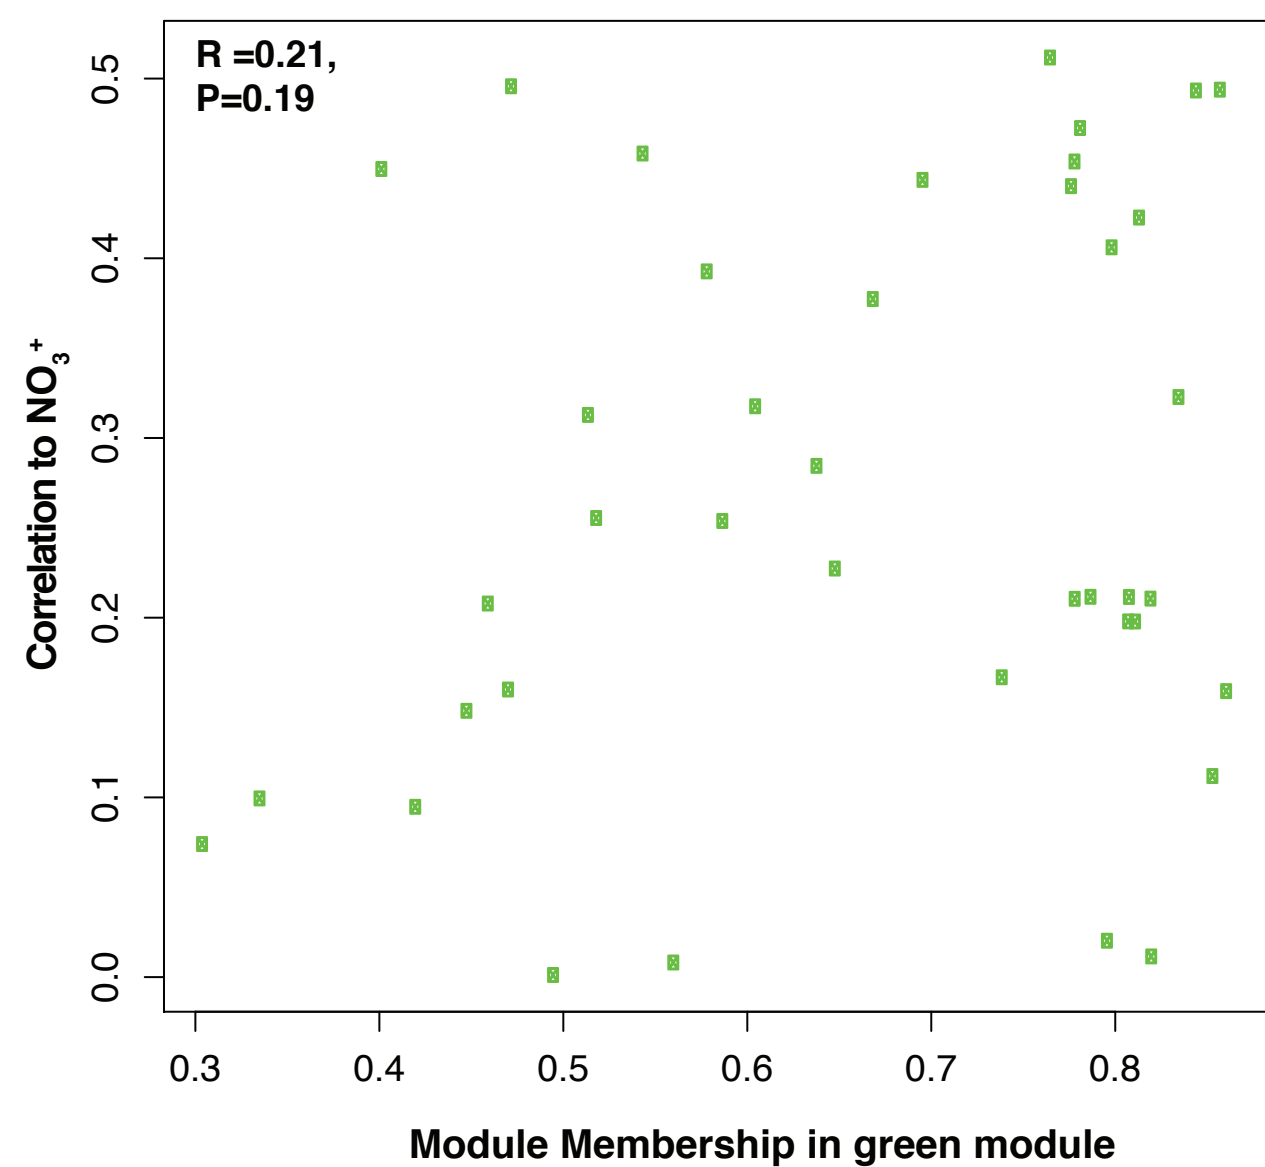**D****Module membership vs. population significance**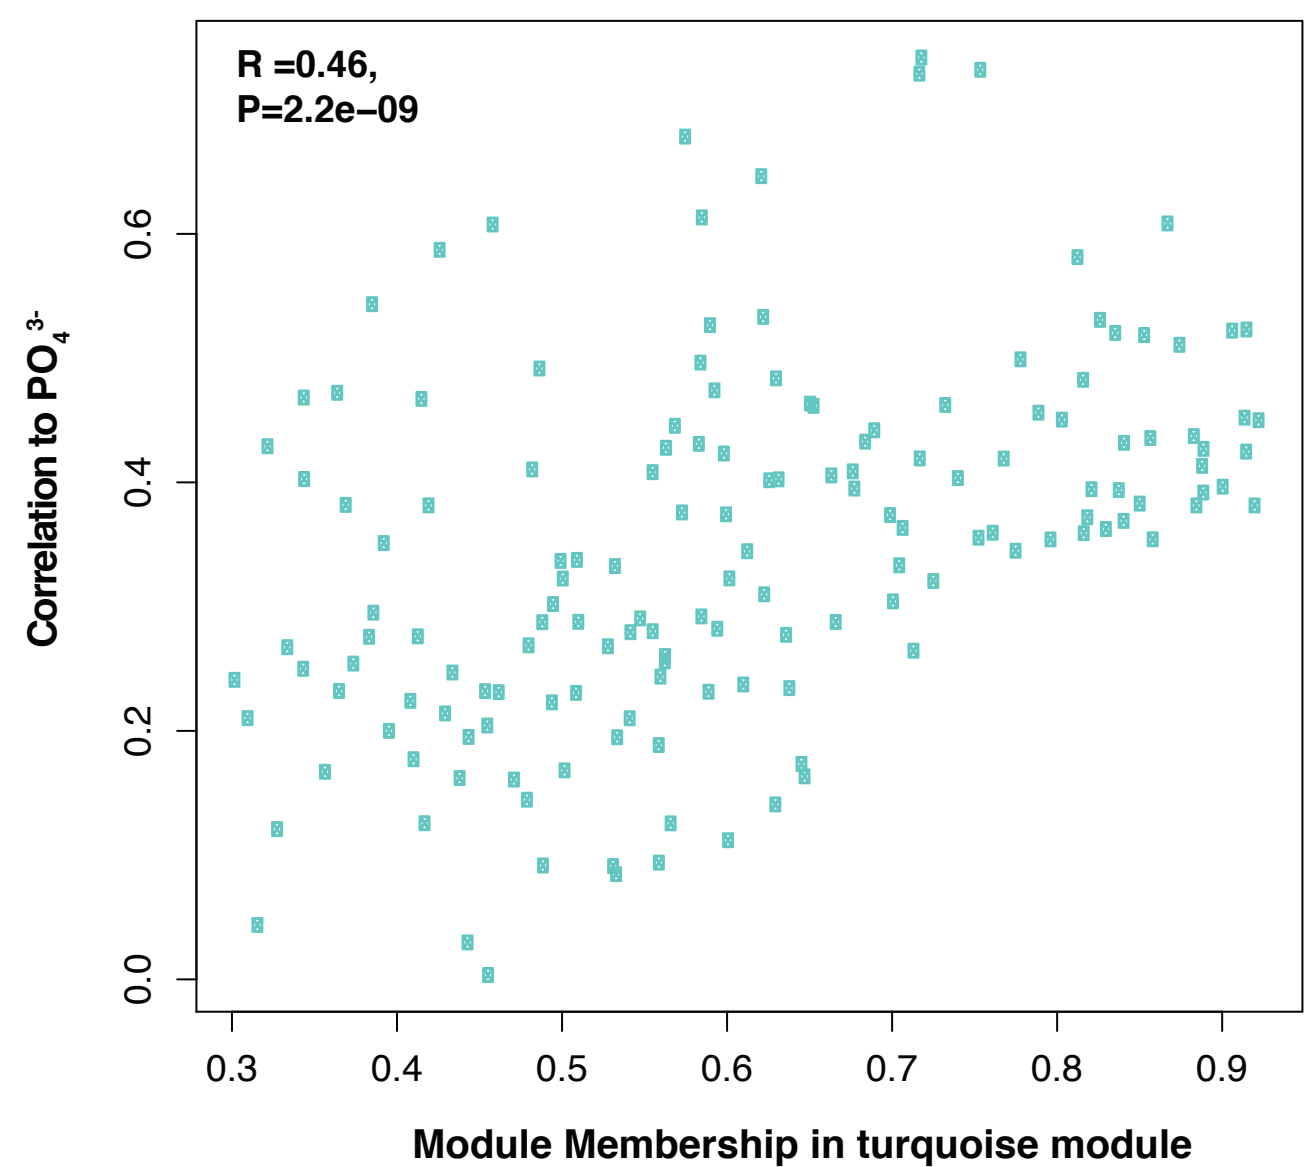**C****Comparison of  $NO_3^+$  measured vs predicted for module green**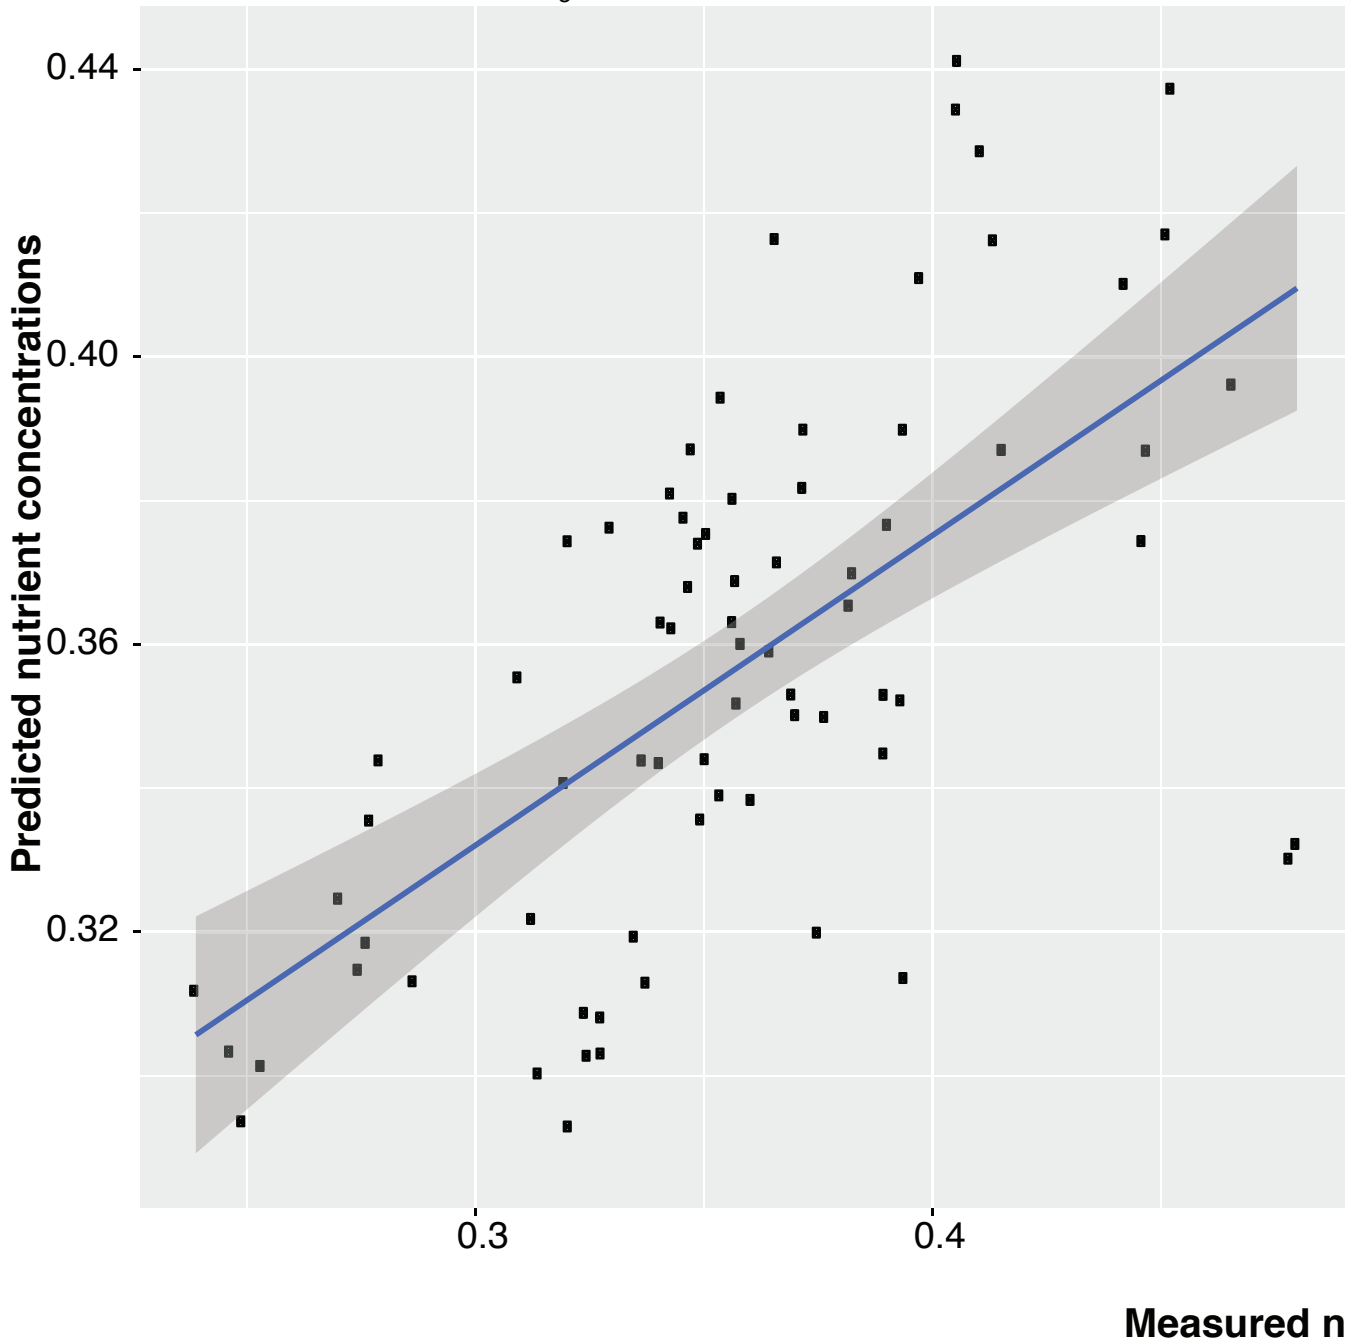**E****Comparison of  $PO_4^{3-}$  measured vs predicted for module turquoise**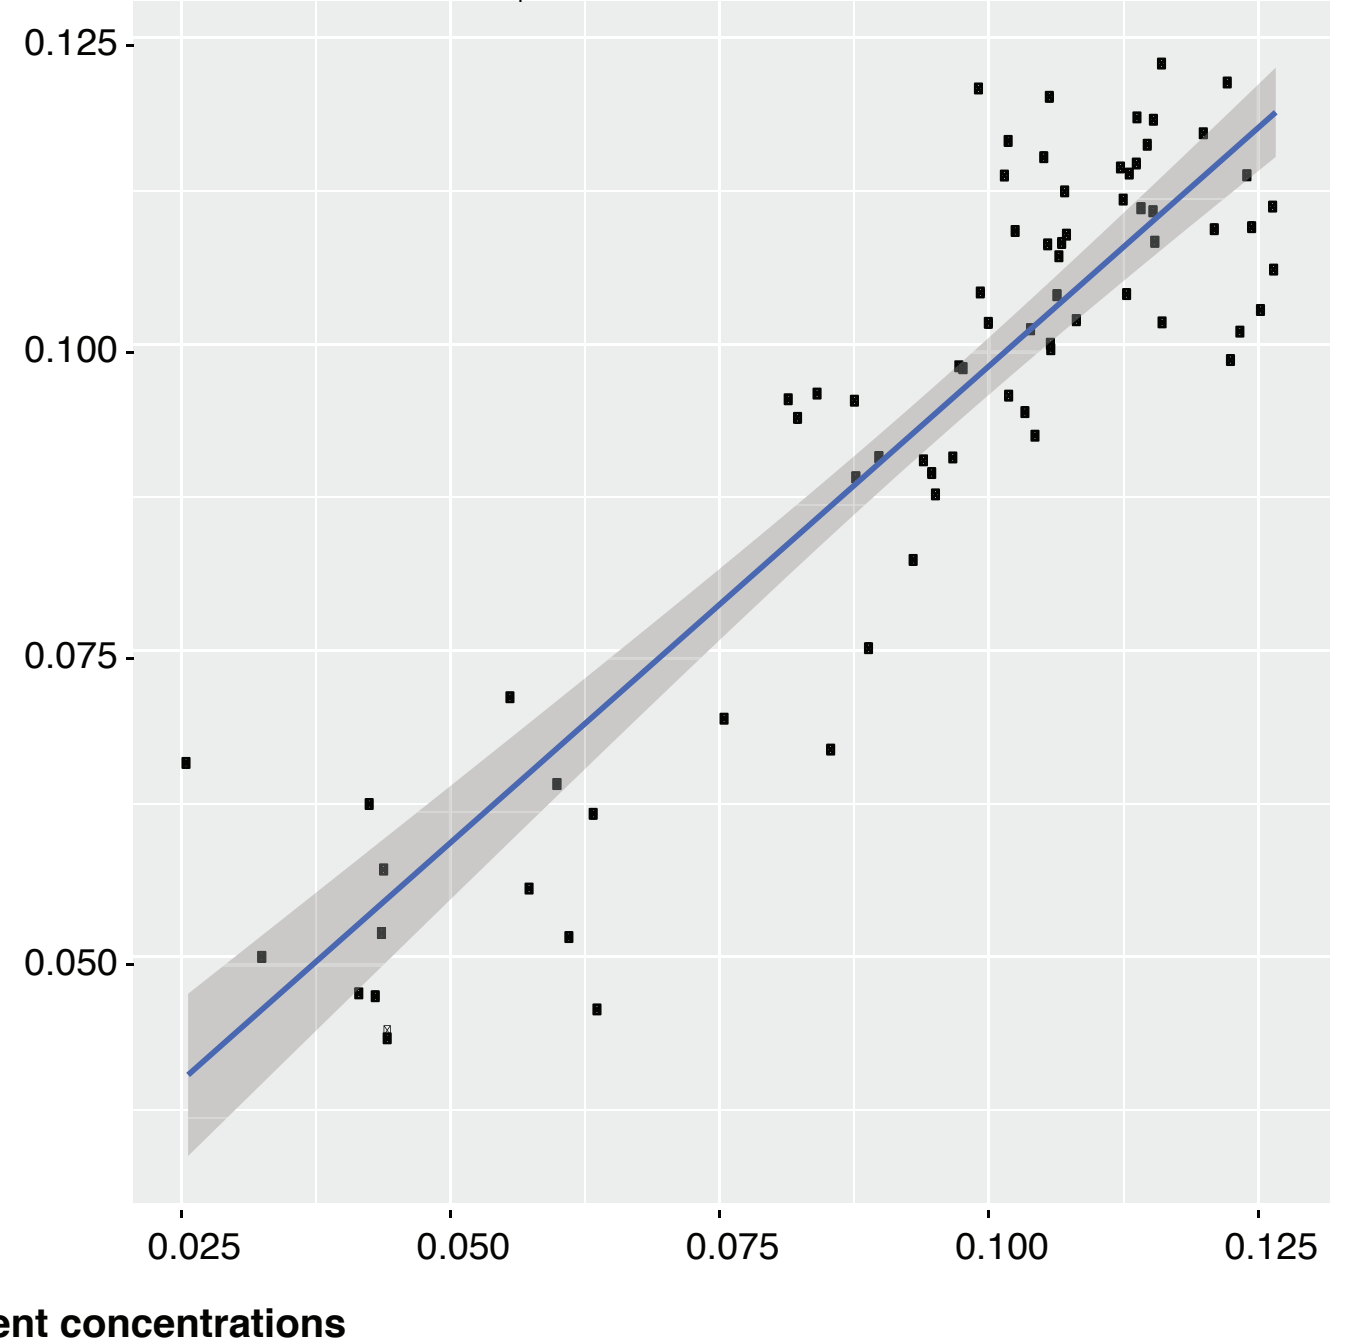

Supplement: Supplementary file [file 091512-8.pdf]
